# Supplementary material for: Glucocerebrosidase inhibition causes mitochondrial dysfunction and free radical damage
Source: PubMed Central journal article supplement (PMC3550523; doi:10.1016/j.neuint.2012.10.010), 2013-01

# Suppl Fig.3

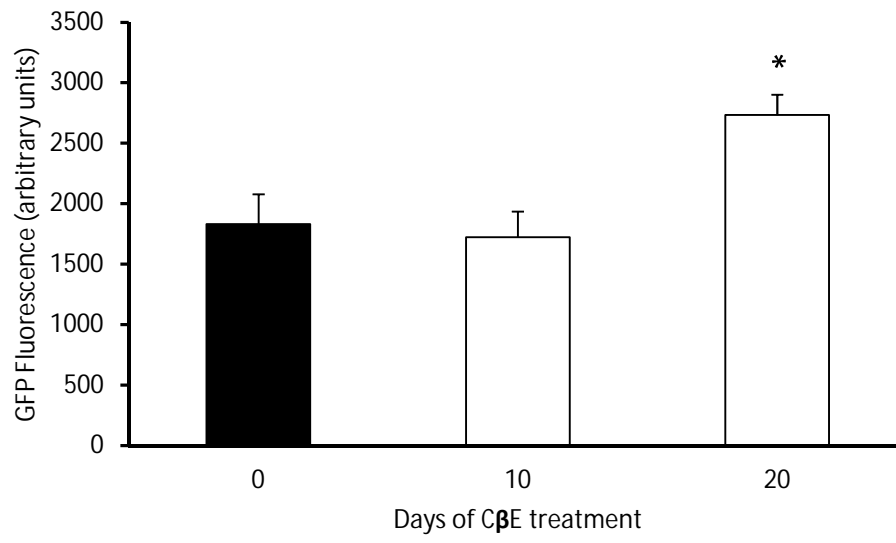

Supplement: mmc3.pdf [file mmc3.pdf]
