# Supplementary material for: Glucocerebrosidase inhibition causes mitochondrial dysfunction and free radical damage
Source: PubMed Central journal article supplement (PMC3550523; doi:10.1016/j.neuint.2012.10.010), 2013-01

Suppl Fig.6A

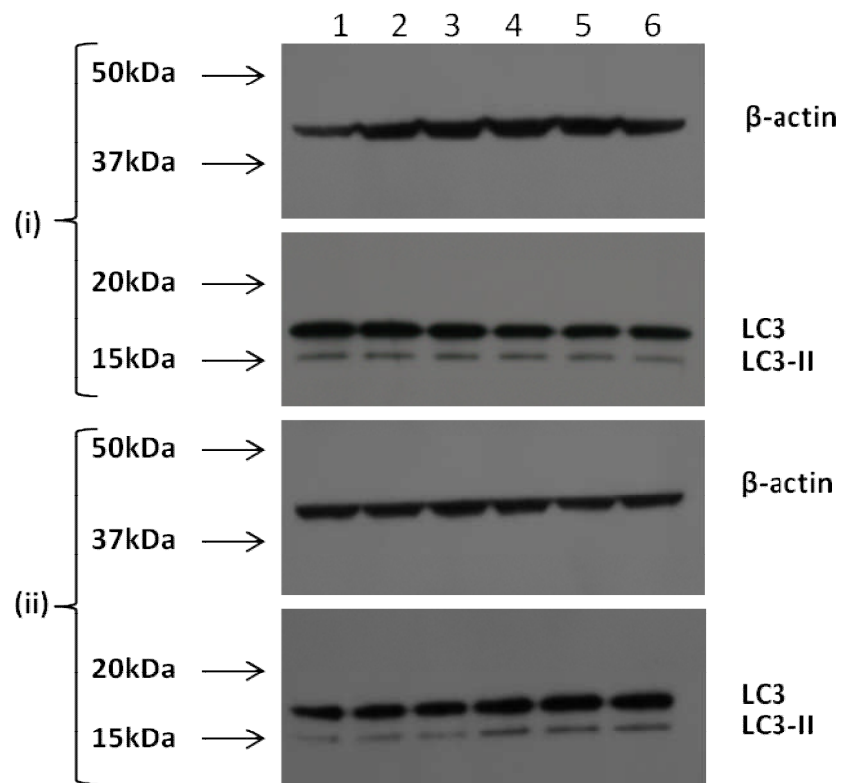

Suppl Fig.6B

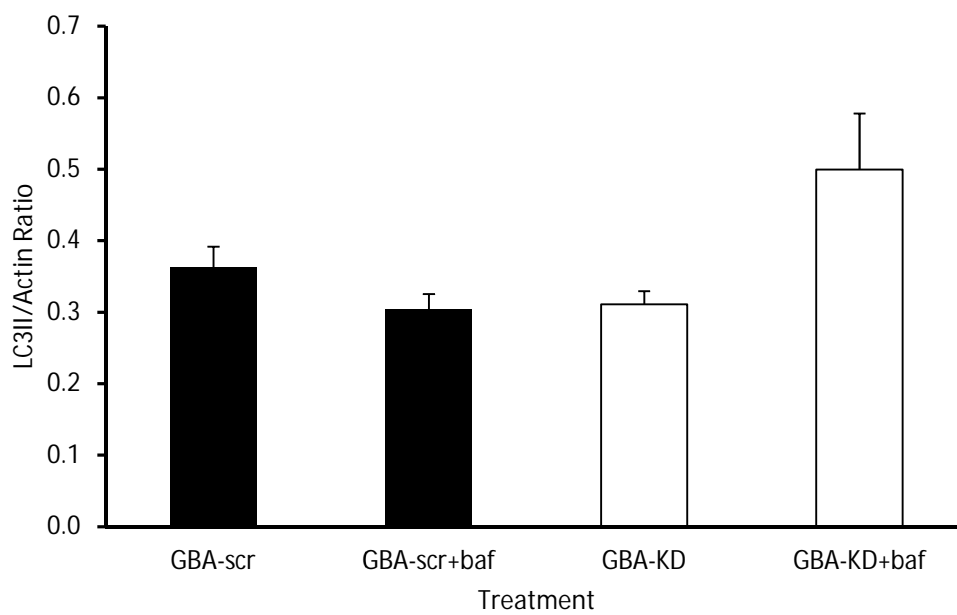

Supplement: mmc9.pdf [file mmc9.pdf]
